# Supplementary material
Source: PubMed Central journal article supplement (PMC9766204)
Supplement: mmc1.pdf [file mmc1.pdf]

# THE LANCET

## Diabetes & Endocrinology

### Supplementary appendix

This appendix formed part of the original submission. We post it as supplied by the authors.

Supplement to: Atkinson M A, Powers A C. Distinguishing the real from the hyperglycaemia: does COVID-19 induce diabetes?. *Lancet Diabetes Endocrinol* 2021; published online April 7. [https://doi.org/10.1016/S2213-8587\(21\)00087-5](https://doi.org/10.1016/S2213-8587(21)00087-5).

## References for panel

Coate KC, Cha J, Shrestha S, et al. SARS-CoV-2 cell entry factors ACE2 and TMPRSS2 are expressed in the microvasculature and ducts of human pancreas but are not enriched in  $\beta$  cells. *Cell Metab* 2020; **32**: 1028–40.e4.

Figvani D, Licata G, Brusco N, et al. SARS-CoV-2 receptor angiotensin I-converting enzyme type 2 (ACE2) is expressed in human pancreatic  $\beta$ -cells and in the human pancreas microvasculature. *Front Endocrinol (Lausanne)* 2020; **11**: 596898.

Hikmet F, Méar L, Edvinsson Å, Micke P, Uhlén M, Lindskog C. The protein expression profile of ACE2 in human tissues. *Mol Syst Biol* 2020; **16**: e9610.

Kusmartseva I, Wu W, Syed F, et al. Expression of SARS-CoV-2 entry factors in the pancreas of normal organ donors and individuals with COVID-19. *Cell Metab* 2020; **32**: 1041–51.e6.

Müller JA, Groß R, Conzelmann C, et al. SARS-CoV-2 infects and replicates in cells of the human endocrine and exocrine pancreas. *Nat Metab* 2021; **3**: 149–65.

Yang J-K, Lin S-S, Ji X-J, Guo L-M. Binding of SARS coronavirus to its receptor damages islets and causes acute diabetes. *Acta Diabetol* 2010; **47**: 193–99.

Yang L, Han Y, Nilsson-Payant BE, et al. A human pluripotent stem cell-based platform to study SARS-CoV-2 tropism and model virus infection in human cells and organoids. *Cell Stem Cell* 2020; **27**: 125–36.e7.
